# Supplementary material
Source: ML conference proceedings conference paper supplement (https://openreview.net/forum?id=0JSolJVzjd)
Supplement: supplementary_material [file Improved_Approximation_Algorithms_for_Chromatic_and_Pseudometric_Weighted_Correlation_Clustering-appendix.pdf › Improved_Approximation_Algorithms_for_Chromatic_and_Pseudometric_Weighted_Correlation_Clustering-appendix.pdf]

## Technical Appendices and Supplementary Material

### A Proof for 6-approximation on Pseudometric-weighted CC with LP-UMVD-PIVOT

With the parameters  $\alpha = \frac{1}{3}$  and  $\beta = 0$ , the corresponding rounding functions are as follows:

$$f^+(x) = f^-(x) = \begin{cases} 0, & x < \frac{1}{3}; \\ x, & \frac{1}{3} \leq x \leq \frac{2}{3}; \\ 1, & x > \frac{2}{3}. \end{cases} \quad (16)$$

Since the formulas for  $e.cost$  and  $e.lp$  in the pseudometric-weighted CC are compatible with those in the classical CC, and weights  $w$  affect  $\mathcal{C}$  linearly, the following lemma presented by Chawla et al. [16] remains applicable.

**Lemma 3** (Lemma 5 of [16]). *Suppose  $f^+$  is a monotonically non-decreasing piecewise convex function;  $f^-$  is a monotonically non-decreasing piecewise concave function. Then  $\mathcal{C} \geq 0$  for all possible configurations if it holds whenever:*

1. *the triangle inequality is tight for  $(x_{uv}, x_{vw}, x_{wu})$ ; or*
2. *each value of  $x_e$  ( $e \in \{uv, vw, wu\}$ ) belongs to the endpoint of the domain for some piece of the rounding function  $f^s$ , where  $s$  is the sign of  $e$ .*

Therefore, it suffices to show  $6 \cdot LP - ALG \geq 0$  in either of the two cases outlined above.

We introduce another useful lemma:

**Lemma 4.** *If  $x_{uv}, x_{vw}, x_{wu} \in [\frac{1}{\alpha}, 1 - \frac{1}{\alpha}]$ , then  $\alpha \cdot LP - ALG \geq 0$ .*

*Proof.*

$$\begin{aligned} \alpha \cdot e.lp_w - e.cost_w &\geq \alpha(1 - p_{vw}p_{wu}) \min\{x, 1 - x\} \\ &\quad - \max\{p_{vw}(1 - p_{wu}) + (1 - p_{vw})p_{wu}, (1 - p_{vw})(1 - p_{wu})\} \\ &\geq \alpha(1 - p_{vw}p_{wu}) \cdot \frac{1}{\alpha} - (1 - p_{vw}p_{wu}) = 0. \end{aligned}$$

Same inequality holds for other vertices, hence  $\alpha \cdot LP - ALG \geq 0$ .  $\square$

For notational simplicity, define  $(x, y, z) := (x_{uv}, x_{vw}, x_{wu})$  and w.l.o.g.  $x \leq y \leq z$ .

#### A.1 Triangle inequality is tight.

In this case,  $z = x + y$ . As the rounding functions are defined piecewise, we can partition the entire space of possible configuration of  $(x, y)$  into a finite number of regions (labeled I through VI in Figure 2) where the behaviors of  $p_{uv}, p_{vw}, p_{wu}$  are well identified in each.

Since  $f^+ = f^-$ , the value of  $p_e$  is independent of the sign of  $e$ , therefore the formula for both  $e.cost_w$  and  $e.lp_w$  are independent of the sign of the edges  $vw$  and  $wu$ . Therefore, once the region and the sign of the edge  $uv$  are fixed, the formula for  $e.cost_w$  and  $e.lp_w$  are fully resolved as a function of  $x, y, z$ , as shown in Table 1. By the implication of Lemma 2 it suffices to verify all possible configurations of the following procedure:

1. **Select any region:** This results in 12 corresponding cells, with 6 possible cases.
2. **Select any 2 columns:** This results in 8 corresponding cells, with 3 possible cases.
3. **For each column, select the sign:** This results in 4 corresponding cells, with 4 possible cases.
4. **The following must hold:**  $\alpha \cdot (e.lp_a + e.lp_b) - (e.cost_a + e.cost_b) \geq 0$ , where  $a, b$  are the vertices corresponding to the selected columns.

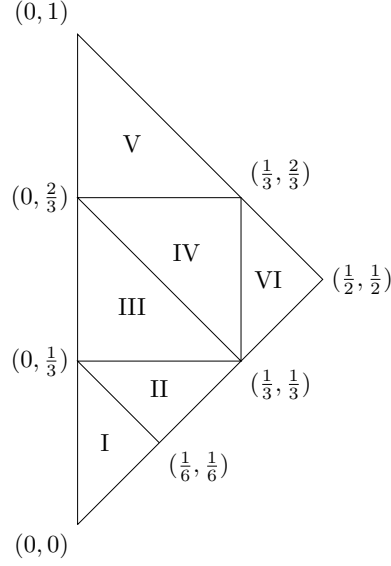

Figure 2: Configuration of regions induced from (16).

Table 1: Formula for  $e.cost$  and  $e.lp$  for each configuration.

| Region | Sign | $x_{uv} = x$     |                   | $x_{vw} = y$ |                  | $x_{wu} = z = x + y$ |                   |
|--------|------|------------------|-------------------|--------------|------------------|----------------------|-------------------|
|        |      | $e.cost_w$       | $e.lp_w$          | $e.cost_u$   | $e.lp_u$         | $e.cost_v$           | $e.lp_v$          |
| I      | ‘+’  | 0                | $x$               | 0            | $y$              | 0                    | $z$               |
|        | ‘-’  | 1                | $1 - x$           | 1            | $1 - y$          | 1                    | $1 - z$           |
| II     | ‘+’  | $z$              | $x$               | $z$          | $y$              | 0                    | $z$               |
|        | ‘-’  | $1 - z$          | $1 - x$           | $1 - z$      | $1 - y$          | 1                    | $1 - z$           |
| III    | ‘+’  | $y + z - 2yz$    | $(1 - yz)x$       | $z$          | $y$              | $y$                  | $z$               |
|        | ‘-’  | $(1 - y)(1 - z)$ | $(1 - yz)(1 - x)$ | $1 - z$      | $1 - y$          | $1 - y$              | $1 - z$           |
| IV     | ‘+’  | $1 - y$          | $(1 - y)x$        | 1            | $y$              | $y$                  | $z$               |
|        | ‘-’  | 0                | $(1 - y)(1 - x)$  | 0            | $1 - y$          | $1 - y$              | $1 - z$           |
| V      | ‘+’  | 0                | 0                 | 1            | $y$              | 1                    | $z$               |
|        | ‘-’  | 0                | 0                 | 0            | $1 - y$          | 0                    | $1 - z$           |
| VI     | ‘+’  | $1 - y$          | $(1 - y)x$        | $1 - x$      | $(1 - x)y$       | $x + y - 2xy$        | $(1 - xy)z$       |
|        | ‘-’  | 0                | $(1 - y)(1 - x)$  | 0            | $(1 - x)(1 - y)$ | $(1 - x)(1 - y)$     | $(1 - xy)(1 - z)$ |

#### A.1.1 Region I, II, V

All formulas are affine; therefore, checking  $\alpha \cdot (e.lp_a + e.lp_b) - (e.cost_a + e.cost_b) \geq 0$  at the extremal points is sufficient. Table 2 shows extremal points of the regions with the value of  $6 \cdot e.cost - e.lp$  for each configuration. In each region with the point, adding any two values from different columns results in a nonnegative value, validating the nonnegativity throughout the region with sign configuration.

#### A.1.2 Region III

We can also further optimize procedures 3 and 4: Compute  $\alpha \cdot e.lp_a - e.cost_a$  for each region, sign, and vertex configuration. For a given region and vertex, if one sign configuration dominates another, choose the smaller one.

For example, consider  $6 \cdot e.lp_w - e.cost_w$  in Table 1. Since  $x \leq \frac{1}{2}$ ,  $(1 - yz)(1 - x) \geq (1 - yz)x$ . For  $e.cost_w$ ,  $y + z - 2yz \geq (1 - y)(1 - z)$  since

$$y + z - 2yz - (1 - y)(1 - z) = \frac{1 - (2 - 3y)(2 - 3z)}{3} \geq 0$$

Table 2: Value of  $6 \cdot e.lp - e.cost$  for each extremal point of the region.

| Region | $(x, y)$                     | Sign | $6 \cdot e.lp_w - e.cost_w$ | $6 \cdot e.lp_u - e.cost_u$ | $6 \cdot e.lp_v - e.cost_v$ |
|--------|------------------------------|------|-----------------------------|-----------------------------|-----------------------------|
| I      | $(0, 0)$                     | ‘+’  | 0                           | 0                           | 0                           |
|        |                              | ‘-’  | 5                           | 5                           | 5                           |
|        | $(0, \frac{1}{3})$           | ‘+’  | 0                           | 2                           | 2                           |
|        |                              | ‘-’  | 5                           | 3                           | 3                           |
|        | $(\frac{1}{6}, \frac{1}{6})$ | ‘+’  | 1                           | 1                           | 2                           |
|        |                              | ‘-’  | 4                           | 4                           | 3                           |
| II     | $(0, \frac{1}{3})$           | ‘+’  | $-1/3$                      | $5/3$                       | 2                           |
|        |                              | ‘-’  | $16/3$                      | $10/3$                      | 3                           |
|        | $(\frac{1}{6}, \frac{1}{6})$ | ‘+’  | $2/3$                       | $2/3$                       | 2                           |
|        |                              | ‘-’  | $13/3$                      | $1/3$                       | 3                           |
|        | $(\frac{1}{3}, \frac{1}{3})$ | ‘+’  | $4/3$                       | $4/3$                       | 4                           |
|        |                              | ‘-’  | $11/3$                      | $11/3$                      | 1                           |
| V      | $(0, \frac{2}{3})$           | ‘+’  | 0                           | 3                           | 3                           |
|        |                              | ‘-’  | 0                           | 2                           | 2                           |
|        | $(0, 1)$                     | ‘+’  | 0                           | 5                           | 5                           |
|        |                              | ‘-’  | 0                           | 0                           | 0                           |
|        | $(\frac{1}{3}, \frac{2}{3})$ | ‘+’  | 0                           | 3                           | 5                           |
|        |                              | ‘-’  | 0                           | 2                           | 0                           |

since  $y, z \in [1/3, 2/3]$  within the region. Therefore,  $6 \cdot e.lp_w - e.cost_w$  is smaller with the sign ‘+’. Now, consider the minimum value possible for the formula above within the region. Replacing  $x = z - y$ ,

$$6 \cdot e.lp_w - e.cost_w = -6yz^2 + 6y^2z + 2yz - 7y + 5z.$$

Fixing  $y$ , the formula is concave of  $z$ ; therefore, it is minimized in  $z = y$  or  $z = 2/3$ , resulting in  $2y^2 - 2y$  and  $4y^2 - \frac{25}{3}y + \frac{10}{3}$  each. Within the range  $y \in [1/3, 2/3]$ , the minimum value of each is  $-1/2$  in  $y = 1/2$  and  $-4/9$  in  $y = 2/3$ . Thus,  $6 \cdot e.lp_w - e.cost_w \geq -1/2$ .

Finally, consider the minimum value possible for  $6 \cdot e.lp_u - e.cost_u$  and  $6 \cdot e.lp_v - e.cost_v$ . Again, these are affine; hence checking on extremal points is sufficient. It turns out that  $6 \cdot e.lp_u - e.cost_u \geq 4/3$ , minimized at  $(y, z) = (1/3, 2/3)$  with ‘+’ sign;  $6 \cdot e.lp_v - e.cost_v \geq 4/3$ , minimized at  $(y, z) = (1/3, 2/3)$  with ‘-’ sign.

Therefore, any objective value is greater than or equal to  $4/3 - 1/2 = 5/6 \geq 0$  in the region.

### A.1.3 Region IV

We can utilize the optimization method explained in [A.1.2](#) again: Since  $(1-y)x \leq (1-y)(1-x)$  and  $1-y \geq 0$ , the formula with the sign ‘+’ is smaller for  $6 \cdot e.lp_w - e.cost_w$ , which is  $(6x-1)(1-y)$ . This has a minimum value of  $-1/3$  in  $(x, y) = (0, 2/3)$ .

Also, since  $6z-y = 6x+5y \geq 10/3 > 5/2$  in this region, the formula with the sign ‘-’ is smaller for  $6 \cdot e.lp_v - e.cost_v$ , which is  $5-6x-5y$ . This has a minimum value of  $-1/3$  in  $(x, y) = (1/3, 2/3)$ .

The formula for  $6 \cdot e.lp_u - e.cost_u$  is  $6y-1$  or  $6(1-y)$ . Each of them has a minimum value 1 in  $(x, y) = (1/3, 1/3)$ , 2 in  $(x, y) = (0, 2/3)$ , respectively. Thus,  $(6 \cdot e.lp_w - e.cost_w) + (6 \cdot e.lp_u - e.cost_u)$  and  $(6 \cdot e.lp_u - e.cost_u) + (6 \cdot e.lp_v - e.cost_v)$  are at least  $-1/3 + 1 = 2/3 \geq 0$ .

Finally,

$$\begin{aligned} (6 \cdot e.lp_w - e.cost_w) + (6 \cdot e.lp_v - e.cost_v) &\geq (6x-1)(1-y) + (5-6x-5y) \\ &= -6xy - 4y + 4 \geq -6y + 4 \geq 0, \end{aligned}$$

Making the approximation factor  $\alpha = 6$  tight at  $(x, y) = (1/3, 2/3)$  as well as the objective value nonnegative.

#### A.1.4 Region VI

As in IV, the formula with sign ‘+’ is smaller for  $6 \cdot e.lp_w - e.cost_w$ , which is  $(6x - 1)(1 - y)$ . This has a minimum value of  $1/3$  in  $(x, y) = (1/3, 2/3)$ .

The formula for  $6 \cdot e.lp_u - e.cost_u$  is  $(1 - x)(6y - 1)$  or  $6(1 - x)(1 - y)$ . Each of them has a minimum value  $2/3$  in  $(x, y) = (1/3, 1/3)$ ,  $4/3$  in  $(x, y) = (1/3, 2/3)$ , respectively.

For  $6 \cdot e.lp_v - e.cost_v$ , consider the difference between those of ‘+’ sign and ‘-’ sign.

$$\begin{aligned} 6(1 - xy)(z - (1 - z)) - (x + y - 2xy - (1 - x)(1 - y)) &\geq 2(1 - xy) - (-3xy + 2x + 2y - 1) \\ &= xy - 2x - 2y + 3 \\ &= (2 - x)(2 - y) - 1 \geq \frac{11}{9} > 0, \end{aligned}$$

since  $z \geq 2/3$ . Therefore, the formula with sign ‘-’ is smaller, which is  $6(1 - xy)(1 - z) - (1 - x)(1 - y)$ .

Define  $p = xy$ , then

$$6(1 - xy)(1 - z) - (1 - x)(1 - y) = 6pz - 5z - 7p + 5,$$

with region  $z \in [2/3, 1]$ ,  $p \in \left[\frac{z}{3} - \frac{1}{9}, \left(\frac{z}{2}\right)^2\right]$ . Fixing the value of  $z$ , it is a decreasing function with respect to  $p$ ; fixing the value of  $p$ , it is a decreasing function with respect to  $z$ . Therefore, the function is minimized at  $z = 1$ ,  $p = \frac{1}{4}$  with the value  $-\frac{1}{4}$ .

Therefore, any objective value is greater than or equal to  $1/3 - 1/4 = 1/12 \geq 0$  in the region.

Overall,  $6 \cdot LP - ALG \geq 0$  when the triangle inequality is tight.

#### A.2 All coordinates belong to endpoint of segments.

There are total 4 possible LP values: 0,  $1/3$ ,  $2/3$ , 1. Among all the possible  $(x, y, z)$  tuples, there are only 7 tuples whose triangle inequality is not tight. Moreover, 3 tuples  $(x, y, z) = (\frac{1}{3}, \frac{1}{3}, \frac{1}{3})$ ,  $(\frac{1}{3}, \frac{2}{3}, \frac{2}{3})$ ,  $(\frac{2}{3}, \frac{2}{3}, \frac{2}{3})$  among them only consist of value  $1/3$  or  $2/3$ , thus  $3 \cdot LP - ALG \geq 0$  by Lemma 4. Therefore, we only need to verify the remaining 3 tuples.

Since left-side and right-side limits of the value of rounding function at such point might differ, we have to consider all possible limits of  $6 \cdot LP - ALG$  up to  $2^3 = 8$  directions. Table 3 shows remaining 3 tuples and the directional limit of the value of  $6 \cdot e.cost - e.lp$  for each configuration. Note that since  $x \leq y \leq z$ , only up to 4 out of 8 directions are required to verification. As in argument on region I, II, V of Case 1, in each point with direction specified, adding any two values with different column results in a nonnegative value, validating the nonnegativity.

This completes our case analysis.

## B Proof for Theorem 1

Suppose that LP-PIVOT achieves an expected  $\alpha$ -approximation.

We begin by considering the configuration  $(x, 1 - x, 1)$  with signs  $(+, +, -)$  or  $(+, -, -)$  and weights  $(1, 0, 1)$ . Then:

$$\alpha(1 - f^+(1 - x))x \geq (2 - f^+(x))(1 - f^+(1 - x)), \quad (17)$$

$$\alpha(1 - f^-(1 - x))x \geq (2 - f^+(x))(1 - f^-(1 - x)), \quad (18)$$

which implies:

$$f^+(x) \leq 2 - \alpha x \implies f^+(1 - x) = f^-(1 - x) = 1. \quad (19)$$

Next, consider the configuration  $(0, x, x)$  with signs  $(+, +, +)$  and weights  $(1, 1, 0)$ :

$$\alpha x \geq 3f^+(x) - 2f^+(x)^2, \quad (20)$$

which yields the bound  $f^+(x) \leq \alpha x$ . Therefore, for  $x \in [0, 1/\alpha]$ , we have

$$f^+(x) \leq \alpha x \leq 2 - \alpha x, \quad f^+(1 - x) = 1.$$

Table 3: Value of  $6 \cdot e.lp - e.cost$  for each points in consideration of Case 2.

| $(x, y, z)$                                       | Sign                                               | $6 \cdot e.lp_w - e.cost_w$                      | $6 \cdot e.lp_u - e.cost_u$                       | $6 \cdot e.lp_v - e.cost_v$                          |
|---------------------------------------------------|----------------------------------------------------|--------------------------------------------------|---------------------------------------------------|------------------------------------------------------|
| $(\frac{2}{3} - \delta, \frac{2}{3} - \delta, 1)$ | $\begin{smallmatrix} '+' \\ '-' \end{smallmatrix}$ | $\begin{smallmatrix} 1 \\ 2/3 \end{smallmatrix}$ | $\begin{smallmatrix} 1 \\ 2/3 \end{smallmatrix}$  | $\begin{smallmatrix} 26/9 \\ -1/9 \end{smallmatrix}$ |
| $(\frac{2}{3} - \delta, \frac{2}{3} + \delta, 1)$ | $\begin{smallmatrix} '+' \\ '-' \end{smallmatrix}$ | $\begin{smallmatrix} 0 \\ 0 \end{smallmatrix}$   | $\begin{smallmatrix} 1 \\ 2/3 \end{smallmatrix}$  | $\begin{smallmatrix} 5/3 \\ 0 \end{smallmatrix}$     |
| $(\frac{2}{3} + \delta, \frac{2}{3} + \delta, 1)$ | $\begin{smallmatrix} '+' \\ '-' \end{smallmatrix}$ | $\begin{smallmatrix} 0 \\ 0 \end{smallmatrix}$   | $\begin{smallmatrix} 0 \\ 0 \end{smallmatrix}$    | $\begin{smallmatrix} 0 \\ 0 \end{smallmatrix}$       |
| $(\frac{1}{3} - \delta, 1, 1)$                    | $\begin{smallmatrix} '+' \\ '-' \end{smallmatrix}$ | $\begin{smallmatrix} 0 \\ 0 \end{smallmatrix}$   | $\begin{smallmatrix} 5 \\ 0 \end{smallmatrix}$    | $\begin{smallmatrix} 5 \\ 0 \end{smallmatrix}$       |
| $(\frac{1}{3} + \delta, 1, 1)$                    | $\begin{smallmatrix} '+' \\ '-' \end{smallmatrix}$ | $\begin{smallmatrix} 0 \\ 0 \end{smallmatrix}$   | $\begin{smallmatrix} 10/3 \\ 0 \end{smallmatrix}$ | $\begin{smallmatrix} 10/3 \\ 0 \end{smallmatrix}$    |
| $(\frac{2}{3} - \delta, 1, 1)$                    | $\begin{smallmatrix} '+' \\ '-' \end{smallmatrix}$ | $\begin{smallmatrix} 0 \\ 0 \end{smallmatrix}$   | $\begin{smallmatrix} 5/3 \\ 0 \end{smallmatrix}$  | $\begin{smallmatrix} 5/3 \\ 0 \end{smallmatrix}$     |
| $(\frac{2}{3} + \delta, 1, 1)$                    | $\begin{smallmatrix} '+' \\ '-' \end{smallmatrix}$ | $\begin{smallmatrix} 0 \\ 0 \end{smallmatrix}$   | $\begin{smallmatrix} 0 \\ 0 \end{smallmatrix}$    | $\begin{smallmatrix} 0 \\ 0 \end{smallmatrix}$       |
| $(1, 1, 1)$                                       | $\begin{smallmatrix} '+' \\ '-' \end{smallmatrix}$ | $\begin{smallmatrix} 0 \\ 0 \end{smallmatrix}$   | $\begin{smallmatrix} 0 \\ 0 \end{smallmatrix}$    | $\begin{smallmatrix} 0 \\ 0 \end{smallmatrix}$       |

Now consider the configuration  $(x, x, 2x)$  with signs  $(+, +, +)$  and weights  $(1, 1, 0)$ :

$$\alpha x(1 - f^+(x)f^+(2x)) \geq f^+(x) + f^+(2x) - 2f^+(x)f^+(2x). \quad (21)$$

Rewriting the inequality, we obtain:

$$(1 - (2 - \alpha x)f^+(x))f^+(2x) \leq \alpha x - f^+(x). \quad (22)$$

Observe that for  $x \in [0, 1/\alpha]$  where  $f^+(x) < 1$ , the term

$$1 - (2 - \alpha x)f^+(x) \geq 1 - 2f^+(x) + f^+(x)^2 \geq 0$$

is strictly positive. Hence:

$$f^+(2x) \leq \frac{\alpha x - f^+(x)}{1 - (2 - \alpha x)f^+(x)} = \alpha x - \frac{(1 - \alpha x)^2 f^+(x)}{1 - (2 - \alpha x)f^+(x)} \leq \alpha x, \quad (23)$$

for  $x \in [0, 1/\alpha]$ .

Combining the above, we conclude:

$$f^+(x) < \frac{\alpha}{2}x \quad \text{for } x \in [0, 2/\alpha].$$

Set  $x = \frac{4}{3\alpha}$ . Then from (19) and (23), we have:

$$f^+\left(\frac{4}{3\alpha}\right) \leq \frac{2}{3} = 2 - \alpha x, \quad \text{so} \quad f^+\left(1 - \frac{4}{3\alpha}\right) = 1.$$

Since  $f^+(x) < 1$  for  $x \in [0, 2/\alpha]$ , this implies:

$$\frac{2}{\alpha} \leq 1 - \frac{4}{3\alpha} \implies \alpha \geq \frac{10}{3}.$$

Hence, the approximation factor must be at least  $10/3$ .

## C Proof for Theorem 2

We can apply the same argument with Appendix A, with the partition by regions (Figure 3) and formula for  $e.cost$  and  $e.lp$  (Table 4) changed accordingly.

Define  $(x, y, z) := (x_{uv}, x_{vw}, x_{wu})$  and w.l.o.g.  $x \leq y \leq z$ .

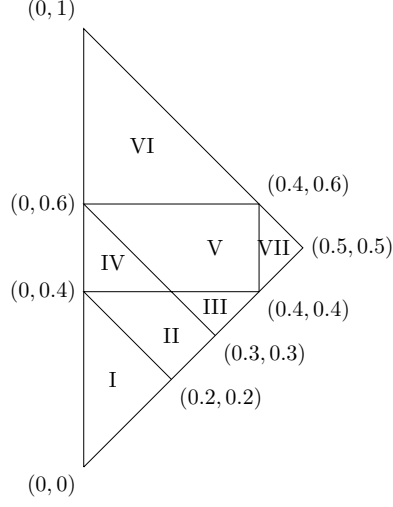

Figure 3: Configuration of regions induced from (11).

Table 4: Formula for  $e.cost$  and  $e.lp$  for each configuration.

| Region | Sign | $x_{uv} = x$                                   |                               | $x_{vw} = y$       |                             |
|--------|------|------------------------------------------------|-------------------------------|--------------------|-----------------------------|
|        |      | $e.cost$                                       | $e.lp$                        | $e.cost$           | $e.lp$                      |
| I      | ‘+’  | 0                                              | $x$                           | 0                  | $y$                         |
|        | ‘-’  | 1                                              | $1 - x$                       | 1                  | $1 - y$                     |
| II     | ‘+’  | $\frac{5}{3}z$                                 | $x$                           | $\frac{5}{3}z$     | $y$                         |
|        | ‘-’  | $1 - \frac{5}{3}z$                             | $1 - x$                       | $1 - \frac{5}{3}z$ | $1 - y$                     |
| III    | ‘+’  | 1                                              | $x$                           | 1                  | $y$                         |
|        | ‘-’  | 0                                              | $1 - x$                       | 0                  | $1 - y$                     |
| IV     | ‘+’  | $\frac{5}{3}y + \frac{5}{3}z - \frac{50}{9}yz$ | $(1 - \frac{25}{9}yz)x$       | $\frac{5}{3}z$     | $y$                         |
|        | ‘-’  | $(1 - \frac{5}{3}y)(1 - \frac{5}{3}z)$         | $(1 - \frac{25}{9}yz)(1 - x)$ | $1 - \frac{5}{3}z$ | $1 - y$                     |
| V      | ‘+’  | $1 - \frac{5}{3}y$                             | $(1 - \frac{5}{3}y)x$         | 1                  | $y$                         |
|        | ‘-’  | 0                                              | $(1 - \frac{5}{3}y)(1 - x)$   | 0                  | $1 - y$                     |
| VI     | ‘+’  | 0                                              | 0                             | 1                  | $y$                         |
|        | ‘-’  | 0                                              | 0                             | 0                  | $1 - y$                     |
| VII    | ‘+’  | $1 - \frac{5}{3}y$                             | $(1 - \frac{5}{3}y)x$         | $1 - \frac{5}{3}x$ | $(1 - \frac{5}{3}x)y$       |
|        | ‘-’  | 0                                              | $(1 - \frac{5}{3}y)(1 - x)$   | 0                  | $(1 - \frac{5}{3}x)(1 - y)$ |

  

| Region | Sign | $x_{wu} = z = x + y$                           |                               |
|--------|------|------------------------------------------------|-------------------------------|
|        |      | $e.cost$                                       | $e.lp$                        |
| I      | ‘+’  | 0                                              | $z$                           |
|        | ‘-’  | 1                                              | $1 - z$                       |
| II     | ‘+’  | 0                                              | $z$                           |
|        | ‘-’  | 1                                              | $1 - z$                       |
| III    | ‘+’  | 0                                              | $z$                           |
|        | ‘-’  | 1                                              | $1 - z$                       |
| IV     | ‘+’  | $\frac{5}{3}y$                                 | $z$                           |
|        | ‘-’  | $1 - \frac{5}{3}y$                             | $1 - z$                       |
| V      | ‘+’  | $\frac{5}{3}y$                                 | $z$                           |
|        | ‘-’  | $1 - \frac{5}{3}y$                             | $1 - z$                       |
| VI     | ‘+’  | 1                                              | $z$                           |
|        | ‘-’  | 0                                              | $1 - z$                       |
| VII    | ‘+’  | $\frac{5}{3}x + \frac{5}{3}y - \frac{50}{9}xy$ | $(1 - \frac{25}{9}xy)z$       |
|        | ‘-’  | $(1 - \frac{5}{3}x)(1 - \frac{5}{3}y)$         | $(1 - \frac{25}{9}xy)(1 - z)$ |

Table 5: Value of  $\frac{10}{3} \cdot e.lp - e.cost$  for each extremal point of the region.

| Region | $(x, y)$                       | Sign | $\frac{10}{3} \cdot e.lp_w - e.cost_w$ | $\frac{10}{3} \cdot e.lp_u - e.cost_u$ | $\frac{10}{3} \cdot e.lp_v - e.cost_v$ |
|--------|--------------------------------|------|----------------------------------------|----------------------------------------|----------------------------------------|
| I      | $(0, 0)$                       | ‘+’  | 0                                      | 0                                      | 0                                      |
|        |                                | ‘-’  | 7/3                                    | 7/3                                    | 7/3                                    |
|        | $(0, \frac{2}{5})$             | ‘+’  | 0                                      | 4/3                                    | 4/3                                    |
|        |                                | ‘-’  | 7/3                                    | 1                                      | 1                                      |
|        | $(\frac{1}{5}, \frac{1}{5})$   | ‘+’  | 2/3                                    | 2/3                                    | 4/3                                    |
|        |                                | ‘-’  | 5/3                                    | 5/3                                    | 1                                      |
| II     | $(0, \frac{2}{5})$             | ‘+’  | -2/3                                   | 2/3                                    | 4/3                                    |
|        |                                | ‘-’  | 3                                      | 5/3                                    | 1                                      |
|        | $(\frac{1}{5}, \frac{1}{5})$   | ‘+’  | 0                                      | 0                                      | 4/3                                    |
|        |                                | ‘-’  | 7/3                                    | 7/3                                    | 1                                      |
|        | $(\frac{1}{5}, \frac{2}{5})$   | ‘+’  | -1/3                                   | 1/3                                    | 2                                      |
|        |                                | ‘-’  | 8/3                                    | 2                                      | 1/3                                    |
|        | $(\frac{3}{10}, \frac{3}{10})$ | ‘+’  | 0                                      | 0                                      | 2                                      |
|        |                                | ‘-’  | 7/3                                    | 7/3                                    | 1/3                                    |
| III    | $(\frac{1}{5}, \frac{2}{5})$   | ‘+’  | -1/3                                   | 1/3                                    | 2                                      |
|        |                                | ‘-’  | 8/3                                    | 2                                      | 1/3                                    |
|        | $(\frac{3}{10}, \frac{3}{10})$ | ‘+’  | 0                                      | 0                                      | 2                                      |
|        |                                | ‘-’  | 7/3                                    | 7/3                                    | 1/3                                    |
|        | $(\frac{2}{5}, \frac{2}{5})$   | ‘+’  | 1/3                                    | 1/3                                    | 8/3                                    |
|        |                                | ‘-’  | 2                                      | 2                                      | -1/3                                   |
| VI     | $(0, \frac{3}{5})$             | ‘+’  | 0                                      | 1                                      | 1                                      |
|        |                                | ‘-’  | 0                                      | 4/3                                    | 4/3                                    |
|        | $(0, 1)$                       | ‘+’  | 0                                      | 7/3                                    | 7/3                                    |
|        |                                | ‘-’  | 0                                      | 0                                      | 0                                      |
|        | $(\frac{2}{5}, \frac{3}{5})$   | ‘+’  | 0                                      | 1                                      | 7/3                                    |
|        |                                | ‘-’  | 0                                      | 4/3                                    | 0                                      |

### C.1 Triangle inequality is tight.

#### C.1.1 Region I, II, III, VI

Affine formulae; refer to Table 5. Also note that the factor  $10/3$  is tight for  $(0, \frac{2}{5}, \frac{2}{5})$  with  $(+, +, +)$ ,

#### C.1.2 Region IV

The argument here is analogous with A.1.2:  $(1 - \frac{25}{9}yz)x \leq (1 - \frac{25}{9}yz)(1 - x)$  as  $x \leq \frac{1}{2}, \frac{5}{3}y + \frac{5}{3}z - \frac{50}{9}yz \geq (1 - \frac{5}{3}y)(1 - \frac{5}{3}z)$  as

$$\frac{5}{3}y + \frac{5}{3}z - \frac{50}{9}yz - \left(1 - \frac{5}{3}y\right)\left(1 - \frac{5}{3}z\right) = \frac{1 - (2 - 5y)(2 - 5z)}{3}$$

and  $y, z \in [2/5, 3/5]$ . Therefore,  $\frac{10}{3} \cdot e.lp_w - e.cost_w$  is smaller with sign ‘+’.

Replacing  $x = z - y$ ,

$$\frac{10}{3} \cdot e.lp_w - e.cost_w = -\frac{250}{27}yz^2 + \frac{250}{27}y^2z + \frac{50}{9}yz - 5y + \frac{5}{3}z.$$

Fixing  $y$ , this formula is concave of  $z$ , hence minimized in either  $z = y$  or  $z = 3/5$ , which yield  $\frac{50}{9}y^2 - \frac{10}{3}y$  and  $\frac{50}{9}y^2 - 5y + 1$  each. Within the range  $y \in [2/5, 3/5]$ , the minimum value of each is  $-1/9$  in  $y = 2/5$  and  $-1/8$  in  $y = 9/20$ . Thus,  $\frac{10}{3} \cdot e.lp_w - e.cost_w \geq -1/8$ .

Finally,  $\frac{10}{3} \cdot e.lp_u - e.cost_u \geq 1/3$ , minimized at  $(y, z) = (2/5, 3/5)$  with ‘+’ sign;  $\frac{10}{3} \cdot e.lp_v - e.cost_v \geq 2/3$ , minimized at  $(y, z) = (2/5, 2/5)$  with ‘+’ sign.

Therefore, any objective value is at least  $1/3 - 1/8 = 5/24 \geq 0$  in the region.

### C.1.3 Region V

The argument here is analogous with [A.1.3](#):  $\frac{10}{3} \cdot e.lp_w - e.cost_w$  is smaller with sign '+', which is  $(\frac{10}{3}x - 1)(1 - \frac{5}{3}y)$ . This has a minimum value of  $-1/9$  in  $(x, y) = (1/5, 2/5)$ .

The formula for  $\frac{10}{3} \cdot e.lp_v - e.cost_v$  is either  $5/3(2x + y)$  or  $7/3 - 5/3(2x + y)$ , whose global minimum value is 0 in  $(x, y) = (2/5, 3/5)$  with sign '-'.

The formula for  $\frac{10}{3} \cdot e.lp_u - e.cost_u$  is either  $10/3 \cdot y - 1$  or  $10/3(1 - y)$ , whose global minimum value is  $1/3$  in  $y = 2/5$  with sign '+'. Thus,  $(\frac{10}{3} \cdot e.lp_w - e.cost_w) + (\frac{10}{3} \cdot e.lp_u - e.cost_u)$  and  $(\frac{10}{3} \cdot e.lp_u - e.cost_u) + (\frac{10}{3} \cdot e.lp_v - e.cost_v)$  are at least  $-1/9 + 1/3 = 2/9 \geq 0$ .

Finally,

$$\begin{aligned} & \left( \frac{10}{3} \cdot e.lp_w - e.cost_w \right) + \left( \frac{10}{3} \cdot e.lp_v - e.cost_v \right) \\ & \geq \min \left\{ \left( \frac{10}{3}x - 1 \right) \left( 1 - \frac{5}{3}y \right) + \frac{5}{3}(2x + y), \left( \frac{10}{3}x - 1 \right) \left( 1 - \frac{5}{3}y \right) + \frac{7}{3} - \frac{5}{3}(2x + y) \right\} \\ & = \min \left\{ \left( \frac{10}{3}x - 2 \right) \left( 2 - \frac{5}{3}y \right) + 3, \frac{50}{9}xy + \frac{4}{3} \right\} \\ & \geq \min \left\{ 1, \frac{4}{3} \right\} \geq 1 \geq 0. \end{aligned}$$

### C.1.4 Region VII

The argument here is analogous with [A.1.4](#):  $\frac{10}{3} \cdot e.lp_w - e.cost_w$  is smaller with sign '+', which is  $(\frac{10}{3}x - 1)(1 - \frac{5}{3}y)$ . This has a minimum value of 0 in  $(x, y) = (0.4, 0.6)$ .

The formula for  $\frac{10}{3} \cdot e.lp_u - e.cost_u$  is either  $(1 - \frac{5}{3}x)(\frac{10}{3}y - 1)$  or  $\frac{10}{3}(1 - \frac{5}{3}x)(1 - y)$ , whose global minimum value is  $1/9$  in  $(x, y) = (2/5, 2/5), (1/2, 1/2)$  with sign '+'. For  $\frac{10}{3} \cdot e.lp_v - e.cost_v$ ,

$$\begin{aligned} & \frac{10}{3} \left( 1 - \frac{25}{9}xy \right) (2z - 1) - \left( \frac{5}{3}x + \frac{5}{3}y - \frac{50}{9}xy - \left( 1 - \frac{5}{3}x \right) \left( 1 - \frac{5}{3}y \right) \right) \\ & \geq 2 \left( 1 - \frac{25}{9}xy \right) - \left( -\frac{25}{3}xy + \frac{10}{3}x + \frac{10}{3}y - 1 \right) \\ & = \frac{25}{9}xy - \frac{10}{3}x - \frac{10}{3}y + 3 \\ & = \left( 2 - \frac{5}{3}x \right) \left( 2 - \frac{5}{3}y \right) - 1 \geq \frac{1}{3} \geq 0, \end{aligned}$$

since  $z \geq \frac{4}{5}$ . Therefore, the formula with sign '-' is smaller, which is  $\frac{10}{3}(1 - \frac{25}{9}xy)(1 - z) - (1 - \frac{5}{3}x)(1 - \frac{5}{3}y)$ .

Define  $p = xy$ , then

$$\frac{10}{3} \left( 1 - \frac{25}{9}xy \right) (1 - z) - \left( 1 - \frac{5}{3}x \right) \left( 1 - \frac{5}{3}y \right) = \frac{250}{27}pz - \frac{5}{3}z - \frac{325}{27}p + \frac{7}{3},$$

with region  $z \in [4/5, 1]$ ,  $p \in \left[ \frac{2}{5}z - \frac{4}{25}, \left( \frac{z}{2} \right)^2 \right]$ . Fixing the value of  $z$ , it is a decreasing function with respect to  $p$ . Therefore, the function is minimized when  $p = \left( \frac{z}{2} \right)^2$ , which now becomes:

$$\frac{125}{54}z^3 - \frac{325}{108}z^2 - \frac{5}{3}z + \frac{7}{3}.$$

This function decreases in the range  $z \in [4/5, 1]$ , hence the minimum value is  $-1/36$  in  $z = 1$ . Therefore,  $(\frac{10}{3} \cdot e.lp_w - e.cost_w) + (\frac{10}{3} \cdot e.lp_u - e.cost_u)$  and  $(\frac{10}{3} \cdot e.lp_u - e.cost_u) + (\frac{10}{3} \cdot e.lp_v - e.cost_v)$  are at least  $1/9 - 1/36 = 1/12 \geq 0$ .



Table 6: Value of  $\frac{10}{3} \cdot e.lp - e.cost$  for each points in consideration of Case 2.

| $(x, y, z)$                     | Sign        | $\frac{10}{3} \cdot e.lp_w - e.cost_w$ | $\frac{10}{3} \cdot e.lp_u - e.cost_u$ | $\frac{10}{3} \cdot e.lp_v - e.cost_v$ |
|---------------------------------|-------------|----------------------------------------|----------------------------------------|----------------------------------------|
| $(\frac{3}{5}, \frac{3}{5}, 1)$ | ‘+’,<br>‘-’ | 0<br>0                                 | 0<br>0                                 | 0<br>0                                 |
| $(\frac{2}{5} - \delta, 1, 1)$  | ‘+’,<br>‘-’ | 0<br>0                                 | $7/3$<br>0                             | $7/3$<br>0                             |
| $(\frac{2}{5} + \delta, 1, 1)$  | ‘+’,<br>‘-’ | 0<br>0                                 | $7/9$<br>0                             | $7/9$<br>0                             |
| $(\frac{3}{5}, 1, 1)$           | ‘+’,<br>‘-’ | 0<br>0                                 | 0<br>0                                 | 0<br>0                                 |
| $(1, 1, 1)$                     | ‘+’,<br>‘-’ | 0<br>0                                 | 0<br>0                                 | 0<br>0                                 |

Finally,

$$\begin{aligned}
& \left( \frac{10}{3} \cdot e.lp_w - e.cost_w \right) + \left( \frac{10}{3} \cdot e.lp_v - e.cost_v \right) \\
& \geq \left( \frac{10}{3}x - 1 \right) \left( 1 - \frac{5}{3}y \right) + \frac{10}{3} \left( 1 - \frac{25}{9}xy \right) (1 - z) - \left( 1 - \frac{5}{3}x \right) \left( 1 - \frac{5}{3}y \right) \\
& = (5x - 2) \left( 1 - \frac{5}{3}y \right) + \frac{10}{3} \left( 1 - \frac{25}{9}xy \right) (1 - z) \\
& \geq 0 \cdot 0 + \frac{10}{3} \cdot \frac{11}{36} \cdot 0 = 0,
\end{aligned}$$

since  $x \geq \frac{2}{5}$ ,  $y \leq \frac{3}{5}$ ,  $z \leq 1$ .

### C.2 All coordinates belong to endpoint of segments.

There are also 4 tuples of  $(x, y, z)$  to verify, which are fully covered in Table 6. Note that there are now only single point  $2/5$  where rounding functions are not continuous.

This completes our case analysis.

## D Proof for Theorem 3

Suppose LP-CCC is an expected  $\alpha$ -approximation algorithm, where  $2 \leq \alpha < 4$ .

Plugging  $(\frac{1}{2}, \frac{1}{2}, 1)$  with  $(\circ, \circ, -)$ , we obtain:

$$\alpha \left( 1 - f^\circ \left( \frac{1}{2} \right) \right) \geq 2 \left( 1 - f^\circ \left( \frac{1}{2} \right) \right) + \left( 1 - f^\circ \left( \frac{1}{2} \right) \right)^2, \quad (24)$$

which implies:

$$f^\circ \left( \frac{1}{2} \right) \geq 3 - \alpha. \quad (25)$$

Next, plugging  $(\frac{1}{4}, \frac{1}{4}, \frac{1}{2})$  with  $(+, +, \circ)$  yields:

$$\frac{1 - f^+ \left( \frac{1}{4} \right)^2 + 2 \left( f^+ \left( \frac{1}{4} \right) + f^\circ \left( \frac{1}{2} \right) - 2f^+ \left( \frac{1}{4} \right) f^\circ \left( \frac{1}{2} \right) \right)}{\frac{3}{4} \left( 1 - f^+ \left( \frac{1}{4} \right)^2 \right) + \frac{1}{2} \left( 1 - f^+ \left( \frac{1}{4} \right) f^\circ \left( \frac{1}{2} \right) \right)} \leq \alpha, \quad (26)$$

which can be rewritten as:

$$\left( 2 + \left( \frac{\alpha}{2} - 4 \right) f^+ \left( \frac{1}{4} \right) \right) f^\circ \left( \frac{1}{2} \right) \leq \frac{\alpha}{4} \left( 5 - 3f^+ \left( \frac{1}{4} \right)^2 \right) + \left( f^+ \left( \frac{1}{4} \right) - 1 \right)^2 - 2. \quad (27)$$

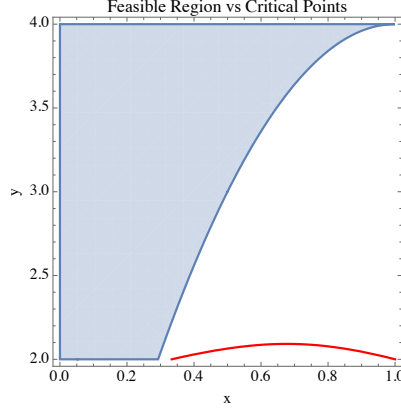

Figure 4: Comparison between the domain of  $g$  and the curve where  $\frac{\partial}{\partial x}g(x, y) = 0$ .

Using the known bound from [16], plugging  $(0, x, x)$  with  $(+, +, +)$  yields:

$$f^+(x) \leq 1 - \sqrt{1 - \alpha x}, \quad (28)$$

which implies:

$$\begin{aligned} \left(2 + \left(\frac{\alpha}{2} - 4\right) f^+\left(\frac{1}{4}\right)\right) &\geq \left(2 + \left(\frac{\alpha}{2} - 4\right) \left(1 - \sqrt{1 - \frac{\alpha}{4}}\right)\right) \\ &= 2\sqrt{1 - \frac{\alpha}{4}} \left(\left(\sqrt{1 - \frac{\alpha}{4}} - \frac{1}{2}\right)^2 + \frac{3}{4}\right) > 0, \end{aligned}$$

for any  $\alpha < 4$ .

Therefore, we obtain the following upper bound on  $f^\circ\left(\frac{1}{2}\right)$ :

$$f^\circ\left(\frac{1}{2}\right) \leq \frac{\frac{\alpha}{4} \left(5 - 3f^+\left(\frac{1}{4}\right)^2\right) + \left(f^+\left(\frac{1}{4}\right) - 1\right)^2 - 2}{2 + \left(\frac{\alpha}{2} - 4\right) f^+\left(\frac{1}{4}\right)}. \quad (29)$$

Define

$$g(x, y) := \frac{\frac{y}{4} (5 - 3x^2) + (x - 1)^2 - 2}{2 + \left(\frac{y}{2} - 4\right) x}$$

for  $x \in [0, 1 - \sqrt{1 - \frac{y}{4}}]$  and  $y \in [2, 4)$ , to examine the maximum possible value of  $f^\circ\left(\frac{1}{2}\right)$  for a given  $\alpha$ .

The partial derivative of  $g(x, y)$  with respect to  $x$  is:

$$\frac{\partial}{\partial x}g(x, y) = \frac{3y - 4}{2(8 - y)} + \frac{5y^3 - 84y^2 + 368y - 448}{2(8 - y)(4 - 8x + xy)^2}. \quad (30)$$

Within the given region,  $\frac{\partial}{\partial x}g(x, y)$  is nonzero, as shown in Figure 4. Moreover, evaluating at  $x = 0$  gives:

$$\left.\frac{\partial}{\partial x}g(x, y)\right|_{x=0} = \frac{5y^3 - 84y^2 + 416y - 512}{32(8 - y)} = -\frac{5y^2 - 44y + 64}{32} \geq \frac{1}{8}. \quad (31)$$

Therefore, for any  $y_0 \in [2, 4)$ , the function  $g(x, y_0)$  is strictly increasing within the region. Consequently,

$$g(x, y_0) \leq g\left(1 - \sqrt{1 - \frac{y_0}{4}}, y_0\right),$$

which corresponds to the parabolic boundary of the region depicted in Figure 4

Parameterizing this curve as  $(1-t, 4(1-t^2))$  for  $t \in (0, \frac{1}{\sqrt{2}}]$ , the value of  $g$  along the curve is:

$$g(1-t, 4(1-t^2)) = \frac{(1-t^2)(2+6t-3t^2)+t^2-2}{2-2(t^2+1)(1-t)} \quad (32)$$

$$= \frac{3t^3-6t^2-4t+6}{2(t^2-t+1)}. \quad (33)$$

This is the upper bound for  $f^\circ(\frac{1}{2})$  when  $\alpha = 4(1-t^2)$ .

On the other hand, from (25), the lower bound is  $3-\alpha = 3-4(1-t^2) = 4t^2-1$ .

Therefore, the inequality

$$2(t^2-t+1)(4t^2-1) \leq 3t^3-6t^2-4t+6 \quad (34)$$

must hold.

Define:

$$h(t) := 2(t^2-t+1)(4t^2-1) - (3t^3-6t^2-4t+6) = 8t^4-11t^3+12t^2+6t-8.$$

Since  $h''(t) = 96t^2-66t+24 > 0$  and  $h'(0) = 6 > 0$ ,  $h$  is convex and increasing for  $t \geq 0$ .

Finally, since  $h(\sqrt{1-\frac{2.11}{4}}) > 0$ , we conclude that  $h(t) > 0$  when  $t \geq \sqrt{1-\frac{2.11}{4}}$ , implying that the lower bound for  $f^\circ(\frac{1}{2})$  exceeds the upper bound when  $\alpha \leq 2.11$ .

Therefore, the approximation factor of LP-CCC for CCC must be greater than 2.11.

## E Proof for Theorem 4

Unlike the pseudometric-weighted case, the variables  $x_{vw}^c$  and  $x_{wu}^c$  can multiplicatively affect the value of  $e.lp_w(u, v)$  in (15). Therefore, Lemma 3 does not apply, and we must instead verify the inequality  $\alpha \cdot LP - ALG \geq 0$  directly.

For sign configurations that do not involve a ‘o’ (i.e., all edges have + or – signs), the inequality  $\alpha \cdot LP - ALG \geq 0$  with  $\alpha = 2.06 - \varepsilon$  is already established in [16]. Thus, it suffices to check the remaining 6 configurations involving at least one ‘o’ sign.

As before, define  $(x, y, z) := (x_{uv}, x_{vw}, x_{wu})$  and  $(p_x, p_y, p_z) := (p_{uv}, p_{vw}, p_{wu})$ .

### E.1 (o, o, o) Triangles

$$2 \cdot e.lp_w(u, v) \geq 2(1-p_{uw}p_{vw}) \cdot \frac{1}{2} = (1-p_{uw}p_{vw}) = e.cost_w(u, v).$$

Since the same inequality holds for all permutations of the endpoints, we conclude:

$$2 \cdot LP - ALG \geq 0.$$

### E.2 (o, o, +) Triangles

If  $z \geq \frac{1}{2}$ ,

$$2 \cdot e.lp_v(w, u) - e.cost_v(w, u) \geq (1-p_xp_y) - (p_x+p_y-2p_xp_y) = (1-p_x)(1-p_y) \geq 0,$$

and by the same reasoning as in Section E.1 we also have

$$2 \cdot e.lp_w(u, v) \geq e.cost_w(u, v), \quad 2 \cdot e.lp_u(v, w) \geq e.cost_u(v, w).$$

Hence,  $2 \cdot LP - ALG \geq 0$ .

Otherwise, i.e., if  $1 - 2z \geq 0$ :

$$\begin{aligned}
2 \cdot LP - ALG &= 2 \cdot \left( (2 - (p_x + p_y)p_z) \max \left\{ \frac{1}{2}, 1 - x, 1 - y, 1 - z \right\} + (1 - p_x p_y)z \right) \\
&\quad - (1 - p_y p_z + 1 - p_x p_z + p_x + p_y - 2p_x p_y) \\
&\geq 2 \cdot ((2 - (p_x + p_y)p_z)(1 - z) + (1 - p_x p_y)z) \\
&\quad - (2 - (p_x + p_y)p_z + (1 - p_x p_y) - (1 - p_x)(1 - p_y)) \\
&= (1 - 2z)(2 - (p_x + p_y)p_z) + (1 - 2z)(p_x p_y - 1) + (1 - p_x)(1 - p_y) \\
&= (1 - 2z)(2 - (p_x + p_y)p_z + p_x p_y - 1) + (1 - p_x)(1 - p_y) \\
&\geq (1 - 2z)(2 - p_x - p_y + p_x p_y - 1) + (1 - p_x)(1 - p_y) \\
&= (1 - 2z)(1 - p_x)(1 - p_y) + (1 - p_x)(1 - p_y) \geq 0.
\end{aligned}$$

### E.3 $(\circ, \circ, -)$ Triangles

If  $z \leq 1 - \frac{1}{\alpha}$ , then as in Section [E.2](#) we have  $\alpha \cdot LP - ALG \geq 0$ .

Otherwise, since  $1 - z \leq 1/\alpha < 1/2$ ,

$$\begin{aligned}
&\alpha \cdot LP - ALG \\
&= \alpha \cdot \left( (2 - (p_x + p_y)z) \max \left\{ \frac{1}{2}, 1 - x, 1 - y, 1 - z \right\} + (1 - p_x p_y)(1 - z) \right) \\
&\quad - (1 - p_y z + 1 - p_x z + (1 - p_x)(1 - p_y)) \\
&= \alpha(2 - (p_x + p_y)z) \max \left\{ \frac{1}{2}, 1 - x, 1 - y \right\} + \alpha(1 - p_x p_y)(1 - z) \\
&\quad - (2 - (p_x + p_y)z + (1 - p_x)(1 - p_y)).
\end{aligned}$$

Fixing the values of  $x$  and  $y$ , the function is affine with respect to  $z$ , and its slope is given by

$$\begin{aligned}
&-\alpha(p_x + p_y) \max \left\{ \frac{1}{2}, 1 - x, 1 - y \right\} - \alpha(1 - p_x p_y) + (p_x + p_y) \\
&\leq \left( -\frac{\alpha}{2} + 1 \right) (p_x + p_y) - \alpha(1 - p_x p_y) \leq 0.
\end{aligned}$$

Therefore, the function is minimized when  $z$  is maximized.

Now, w.l.o.g., assume  $x \leq y$ , and consider the following three cases:

1.  $x \geq 1/2$

$p_x, p_y \geq 0.85$  as  $x, y \geq 1/2$ . Applying  $z = 1$ ,

$$\begin{aligned}
&\alpha \cdot LP - ALG \\
&\geq \alpha(2 - p_x - p_y) \max \left\{ \frac{1}{2}, 1 - x, 1 - y \right\} - (2 - p_x - p_y) - (1 - p_x)(1 - p_y) \\
&= \left( \frac{\alpha}{2} - 1 \right) (2 - p_x - p_y) - (1 - p_x)(1 - p_y) \\
&\geq \left( \frac{\alpha}{2} - 1 \right) (2 - p_x - p_y) - \frac{1}{4}(2 - p_x - p_y)^2 \\
&= \frac{1}{4}(2 - (p_x + p_y))(2\alpha - 6 + (p_x + p_y)).
\end{aligned}$$

Since  $6 - 2\alpha = 1.7 \leq p_x + p_y \leq 2$ ,  $\alpha \cdot LP - ALG \geq 0$ .

2.  $x < 1/2$ ,  $x + y \geq 1$

Applying  $z = 1$  again,

$$\begin{aligned}
&\alpha \cdot LP - ALG \\
&\geq \alpha(2 - p_x - p_y) \max \left\{ \frac{1}{2}, 1 - x, 1 - y \right\} - (2 - p_x - p_y) - (1 - p_x)(1 - p_y) \\
&= (\alpha(1 - x) - 1)(2 - p_x - p_y) - (1 - p_x)(1 - p_y).
\end{aligned}$$

Note that the function is affine with respect to  $p_y$ ; therefore, the function is minimized when  $p_y$  reaches the boundary, i.e.,  $y = 1$  or  $y = 1 - x$ .

If  $y = 1$ , then  $p_y = 1$ , hence

$$\begin{aligned} & (\alpha(1-x) - 1)(2 - p_x - p_y) - (1 - p_x)(1 - p_y) \\ &= (\alpha(1-x) - 1)(1 - p_x) \\ &\geq \left(\frac{\alpha}{2} - 1\right)(1 - p_x) \geq 0. \end{aligned}$$

On the other hand, if  $y = 1 - x$ , then  $p_y = \frac{3}{10}y + \frac{7}{10} = 1 - \frac{3}{10}x$  as  $y > 1/2$ , hence

$$\begin{aligned} & (\alpha(1-x) - 1)(2 - p_x - p_y) - (1 - p_x)(1 - p_y) \\ &= (\alpha(1-x) - 1) \left(1 - \frac{17}{10}x + \frac{3}{10}x\right) - \frac{3}{10} \left(1 - \frac{17}{10}x\right) x \\ &= 3.52 \cdot \left(x - \frac{1}{2}\right) \left(x - \frac{115}{176}\right) \geq 0 \end{aligned}$$

as  $x < 1/2$  and  $p_x = \frac{17}{10}x$ .

3.  $x + y < 1$

Applying  $z = x + y$ ,

$\alpha \cdot LP - ALG$

$$\begin{aligned} &= \alpha(2 - (p_x + p_y)(x + y)) \max \left\{ \frac{1}{2}, 1 - x, 1 - y \right\} + \alpha(1 - p_x p_y)(1 - x - y) \\ &\quad - (2 - (p_x + p_y)(x + y) + (1 - p_x)(1 - p_y)) \\ &= (\alpha(1-x) - 1)(2 - (p_x + p_y)(x + y)) + \alpha(1 - p_x p_y)(1 - x - y) - (1 - p_x)(1 - p_y) \\ &\geq 0.3 \cdot (\alpha(1-x) - 1) + \alpha(1 - p_x p_y)(1 - x - y) - (1 - p_x)(1 - p_y). \end{aligned}$$

For the last inequality, since  $p_x \leq 1.7x$  and  $p_y \leq 1.7y$ ,  $2 - (p_x + p_y)(x + y) \geq 2 - 1.7(x + y)^2 \geq 0.3$ .

Differentiating the function by  $y$ ,

$$\begin{aligned} & -\alpha p_x \frac{dp_y}{dy} \cdot (1 - x - y) - \alpha(1 - p_x p_y) + \frac{dp_y}{dy} \cdot (1 - p_x) \\ &\leq -\alpha p_x \frac{dp_y}{dy} \cdot (1 - x - y) - \alpha(1 - p_x) + \frac{dp_y}{dy} \cdot (1 - p_x) < 0 \end{aligned}$$

since  $\frac{dp_y}{dy} \leq 1.7 < \alpha$ . Hence, the function is minimized when  $y$  is maximized.

Applying  $y = 1 - x$ , since  $y = 1 - x > 1/2$ ,  $p_y = \frac{3}{10}y + \frac{7}{10} = 1 - \frac{3}{10}x$  and thus

$$\begin{aligned} & 0.3 \cdot (\alpha(1-x) - 1) + \alpha(1 - p_x p_y)(1 - x - y) - (1 - p_x)(1 - p_y) \\ &= 0.3 \cdot (\alpha(1-x) - 1) - \left(1 - \frac{17}{10}x\right) \cdot \frac{3}{10}x \\ &= 0.51 \left(x - \frac{1}{2}\right) \left(x - \frac{23}{17}\right) \geq 0 \end{aligned}$$

since  $x < 1/2$ .

#### E.4 $(\circ, +, +)$ Triangles

For Sections [E.4](#) and [E.5](#), we utilize the following lemma, which serves as a weaker version of Lemma [3](#).

**Lemma 5.** *Let the sign configuration be such that the edge  $uv$  is the only edge labeled with a ' $\circ$ ' among the three edges of the triangle. Suppose the rounding function  $f^\circ$  is piecewise affine. Then  $C \geq 0$  for all possible configurations of  $(x_{uv}, x_{vw}, x_{wu})$  if the inequality holds in each of the following cases:*

1. The triangle inequality is tight for  $(x_{uv}, x_{vw}, x_{wu})$ ;
2.  $x_{uv}$  lies at an endpoint of a domain interval for some piece of the function  $f^\circ$ ;
3.  $x_{uv} = \min \left\{ \frac{1}{2}, x_{vw}, x_{wu} \right\}$ .

*Proof.* Fix the values of  $x_{vw}$  and  $x_{wu}$ , and treat  $\mathcal{C}$  as a function of  $x_{uv}$  and  $p_{uv}$ . Within this function, the term involving  $x_{uv}$  appears only in

$$e.lp_w(uv) = (1 - p_{vw}p_{wu}) \cdot \max \left\{ \frac{1}{2}, 1 - x_{uv}, 1 - x_{vw}, 1 - x_{wu} \right\},$$

which is piecewise affine with two domain intervals:

$$\left[ 0, \min \left\{ \frac{1}{2}, x_{vw}, x_{wu} \right\} \right] \quad \text{and} \quad \left[ \min \left\{ \frac{1}{2}, x_{vw}, x_{wu} \right\}, 1 \right].$$

The remaining terms in  $\mathcal{C}$  are affine in  $p_{uv}$ .

Hence,  $\mathcal{C}$  is a piecewise affine function defined over two domains in the  $(x_{uv}, p_{uv})$  space:

$$\left[ 0, \min \left\{ \frac{1}{2}, x_{vw}, x_{wu} \right\} \right] \times [0, 1] \quad \text{and} \quad \left[ \min \left\{ \frac{1}{2}, x_{vw}, x_{wu} \right\}, 1 \right] \times [0, 1].$$

Since  $f^\circ$  is piecewise affine, substituting  $p_{uv} = f^\circ(x_{uv})$  yields a piecewise affine function in  $x_{uv}$ . The breakpoints of this composition occur at:

1. the endpoints of the domain intervals of  $f^\circ$ , and
2. the point  $x_{uv} = \min \left\{ \frac{1}{2}, x_{vw}, x_{wu} \right\}$  where the domain of the piecewise max function changes.

Therefore, the minimum of  $\mathcal{C}$  occurs either at domain boundaries or at breakpoints—precisely the three cases specified in the lemma.  $\square$

Moreover, in this particular case, an even stronger argument can be made: Examining the full formula of  $\mathcal{C} = \alpha \cdot LP - ALG$  with this sign configuration,

$$\begin{aligned} & \alpha \cdot LP - ALG \\ &= \alpha \cdot \left( (1 - p_y p_z) \max \left\{ \frac{1}{2}, 1 - x, 1 - y, 1 - z \right\} + (1 - p_x p_z)y + (1 - p_x p_y)z \right) \\ & \quad - (1 - p_y p_z + p_x + p_z - 2p_x p_z + p_x + p_y - 2p_x p_y) \\ &= \alpha(1 - p_y p_z) \max \left\{ \frac{1}{2}, 1 - x, 1 - y, 1 - z \right\} + (-\alpha(y p_z + p_y z) - 2 + 2(p_y + p_z)) p_x \\ & \quad + \alpha(y + z) - (1 + p_y + p_z - p_y p_z) \end{aligned}$$

The first term is a monotonically decreasing function of  $x$ ; the second term is a monotonically decreasing function of  $p_x$  since  $-\alpha(y p_z + p_y z) - 2 + 2(p_y + p_z) \leq 0$ , as shown in the following Lemma:

**Lemma 6.** For  $f^+$  given as equation 12 and  $\alpha \in \left[ \frac{1}{0.5095}, \frac{2}{3 \cdot 0.5095 - 0.19} \right] \approx [1.963, 2.988]$ ,

$$\alpha(x f^+(y) + f^+(x)y) + 2 - 2(f^+(x) + f^+(y)) \geq 0$$

in  $[0, 1]^2$ .

*Proof.* w.l.o.g.  $x \leq y$ . Consider the 2 possible cases, based on the value of  $y$ .

1.  $y \geq 0.5095$

In this case,  $f^+(y) = 1$  and thus

$$\begin{aligned} & \alpha(xf^+(y) + f^+(x)y) + 2 - 2(f^+(x) + f^+(y)) \\ &= \alpha(x + f^+(x)y) - 2f^+(x), \end{aligned}$$

which is an increasing function of  $y$ .

If  $x \geq 0.5095$ , setting  $y = x$ ,

$$\alpha(x + f^+(x)y) - 2f^+(x) \geq 2\alpha x - 2 \geq 0$$

since  $x > 1/2$ . Otherwise, setting  $y = 0.5095$ ,

$$\alpha(x + f^+(x)y) - 2f^+(x) \geq (\alpha \cdot 0.5095 - 2)f^+(x) + \alpha x$$

is concave of  $x$  since  $\alpha \cdot 0.5095 - 2 < 0$  and  $f^+$  is convex in the range. Hence, this is minimized at either  $x = 0$  or  $x = 0.5095$ , where the former case results in 0 and the latter case results in  $2\alpha \cdot 0.5095 - 2 \geq 0$ .

2.  $y < 0.5095$

As a function of  $y$ ,

$$\begin{aligned} & \alpha(xf^+(y) + f^+(x)y) + 2 - 2(f^+(x) + f^+(y)) \\ &= (\alpha x - 2)f^+(y) + \alpha f^+(x)y + 2 - 2f^+(x) \end{aligned}$$

is concave since  $\alpha x - 2 \leq \alpha \cdot 0.5095 - 2 < 0$  and  $f^+$  is convex in the range. Hence, this is minimized at either  $y = x$  or  $y = 0.5095$ , where the latter case reduce to Case 1, and the former case results in

$$\begin{aligned} & (\alpha x - 2)f^+(y) + \alpha f^+(x)y + 2 - 2f^+(x) \\ &= 2((\alpha x - 2)f^+(x) + 1), \end{aligned}$$

which is  $2 \geq 0$  if  $x < 0.19$ , or

$$2 \left( (\alpha x - 2) \left( \frac{x - 0.19}{0.5095 - 0.19} \right)^2 + 1 \right)$$

otherwise. This is a decreasing function when  $x \in \left[0, \frac{0.19 + 4/\alpha}{3}\right]$ , which contains  $[0, 0.5095]$ .

Therefore, this is minimized when  $x = 0.5095$ , which also reduce to Case 1.

This completes the proof of the lemma.  $\square$

Therefore, as  $p_x$  is a monotonically increasing function of  $x$ , the function is minimized when  $x$  is maximized.

Now, w.l.o.g.  $y \leq z$  and consider all 2 possible cases:

1.  $y + z \geq 1$

Applying  $x = 1$ ,

$$\begin{aligned} & \alpha \cdot LP - ALG \\ & \geq \alpha \cdot \left( (1 - p_y p_z) \max \left\{ \frac{1}{2}, 1 - y, 1 - z \right\} + (1 - p_y)z + (1 - p_z)y \right) \\ & \quad - (3 - p_y p_z - p_z - p_y) \\ & \geq \alpha \cdot \left( \frac{1}{2}(1 - p_y p_z) + (1 - p_z)y + (1 - p_y)z \right) - (3 - p_y p_z - p_z - p_y) \\ & \geq \alpha \cdot \left( \frac{1}{2}(1 - p_y p_z) + (1 - p_y)\frac{p_z}{2} + (1 - p_z)\frac{p_y}{2} \right) - (3 - p_y p_z - p_z - p_y) \\ & = 2.225 \left( \left( \frac{6}{89} \right)^2 - \left( p_y - \frac{83}{89} \right) \left( p_z - \frac{83}{89} \right) \right). \end{aligned}$$

Since  $z \geq 1/2$ ,  $p_z > 0.94 > \frac{83}{89}$ , thus the function is decreasing with respect to  $p_y$ . The minimum value of the function is therefore 0 when  $p_y = p_z = 1$ .

2.  $y + z < 1$

We use the similar argument with of those conducted by Chawla et al. [16] on the  $(+, +, -)$  case. For simplicity, let  $a = 0.19$ ,  $b = 0.5095$ .

If  $y < a$ ,  $p_y = 0$ , hence

$$\begin{aligned}\alpha \cdot LP - ALG &= \alpha \cdot ((1 - y) + (1 - p_x p_z)y + z) - (1 + 2p_x + p_z - 2p_x p_z) \\ &= -\alpha p_x p_z y + \alpha(1 + z) - (1 + 2p_x + p_z - 2p_x p_z).\end{aligned}$$

This is a non-increasing function of  $y$ , and thus it is sufficient to check on  $y = a$ .

If  $z > b$ ,  $p_z = 1$ , hence

$$\begin{aligned}\alpha \cdot LP - ALG &= \alpha \cdot ((1 - p_y)(1 - y) + (1 - p_x)y + (1 - p_x p_y)z) - (2 - 2p_x p_y) \\ &= \alpha(1 - p_x p_y)z + \alpha((1 - p_y)(1 - y) + (1 - p_x)y) - 2(1 - p_x p_y).\end{aligned}$$

This is a non-decreasing function of  $z$ , and thus it is sufficient to check on  $z = b$ .

Now the problem reduces to only  $a \leq y \leq z \leq b$  case, where the formula for  $p_y$  and  $p_z$  are both quadratic.

We now show that the function is minimized when  $y = z$  as well as  $x = y + z$ . Consider the parametrization  $(x, y, z) = (x, t - c, t + c)$ , where  $t \in [a, 1/2]$ ,  $c \in [0, \min\{t - a, b - t\}]$ , and  $x = 2t$  then  $\alpha \cdot LP - ALG$  is a monotonically increasing function of  $x$ . Then

$$\begin{aligned}\alpha \cdot LP - ALG &= \alpha \cdot ((1 - p_y p_z)(1 - t) + (1 - p_x p_z)(t - c) + (1 - p_x p_y)(t + c)) \\ &\quad - (1 + 2p_x + p_y + p_z - p_y p_z - 2p_x p_z - 2p_x p_y) \\ &\quad + \alpha(1 - p_y)c.\end{aligned}$$

Fixing the value of  $t$ , the sum of first 2 terms is a negative even quartic function of  $c$ , where the negativity is obtained from  $-\alpha(1 - t) + 1 \leq -\alpha(1 - b) + 1 < 0$ . Thus, we can write the function as

$$P(t)c^4 + Q(t)c^2 + \alpha(1 - p_y)c + R(t),$$

where  $P(t) = \frac{-\alpha(1-t)+1}{(b-a)^4} < 0$ . Since  $\alpha(1 - p_y)c \geq 0$  if  $c \geq 0$ , it is sufficient to show that

$Q \geq 0$  and  $\sqrt{\frac{Q}{-P}} \geq \min\{t - a, b - t\}$  to prove that the function is minimized when  $c = 0$ .

Calculating the  $Q$ , this results in

$$\begin{aligned}Q(t) &= \frac{2}{(b-a)^2} \cdot \left( (\alpha(1-t) - 1) \left( \frac{t-a}{b-a} \right)^2 + \alpha p_x(t-2a) - (1-2p_x) \right) \\ &= -P(t) \cdot (t-a)^2 + \frac{2}{(b-a)^2} \cdot (-1 + (\alpha t + 2 - 2\alpha a)p_x) \\ &\geq -P(t) \cdot (t-a)^2,\end{aligned}$$

where the final inequality is derived from

$$\frac{1}{\alpha t + 2 - 2\alpha a} \leq \frac{1}{2 - \alpha a} \approx 0.628 < 0.646 = f^\circ(2 \cdot 0.19) \leq p_x.$$

Hence,  $Q \geq -P(t) \cdot (t-a)^2 > 0$  and therefore  $\sqrt{\frac{Q}{-P}} \geq t-a \geq \min\{t-a, b-t\}$ , which implies that  $\alpha \cdot LP - ALG$  is minimized at  $c = 0$ , i.e. at  $(2t, t, t)$ .

Finally, plugging  $(x, y, z) = (2t, t, t)$ ,

$$\begin{aligned}\alpha \cdot LP - ALG &= \alpha \cdot ((1 - p_y^2)(1 - y) + 2(1 - p_x p_y)y) - (1 + 2p_x + 2p_y - p_y^2 - 4p_x p_y) \\ &= (\alpha(1 - p_y^2)(1 - t) + 2\alpha t - 1 - 2p_y + p_y^2) - (2\alpha p_y t + 2 - 4p_y)p_x.\end{aligned}$$

The top left region of Figure 1 shows the region  $(2t, f^\circ(2t))$  where the formula above is negative when  $f^+$  is given as equation 12. Since our proposed  $f^\circ$  doesn't intersect the region,  $\alpha \cdot LP - ALG \geq 0$  if  $y = z$ , and thus  $\alpha \cdot LP - ALG \geq 0$  whenever  $a \leq y \leq z \leq b$ .



### E.5 $(\circ, +, -)$ Triangles

We would prove that the lower bound  $\mathcal{C}'$  of  $\mathcal{C}$ , which is defined as

$$\begin{aligned} & \alpha \cdot LP - ALG \\ &= \alpha \cdot \left( (1 - p_y z) \max \left\{ \frac{1}{2}, 1 - x, 1 - y, 1 - z \right\} + (1 - p_x p_y)(1 - z) + (1 - p_x z)y \right) \\ & \quad - (1 - p_y z + p_x + z - 2p_x z + (1 - p_x)(1 - p_y)) \\ & \geq \alpha \cdot \left( (1 - p_y z) \max \left\{ \frac{1}{2}, 1 - y, 1 - z \right\} + (1 - p_x p_y)(1 - z) + (1 - p_x z)y \right) \\ & \quad - (1 - p_y z + p_x + z - 2p_x z + (1 - p_x)(1 - p_y)) \triangleq \mathcal{C}' \end{aligned}$$

is nonnegative.

Since this is now affine with respect to  $p_x$ , this further enhances the argument Lemma 5 to check only on the endpoint.

1.  $y \geq 1/2, z \leq 1/2$

As in E.2 and E.3  $2 \cdot LP - ALG \geq 0$ .

2.  $y, z \geq 1/2$

Similar with E.4 we can deduce a stronger argument than of Lemma 5. Examining the full formula of  $\mathcal{C}'$ ,

$$\begin{aligned} \mathcal{C}' &= \alpha \cdot \left( (1 - p_y z) \max \left\{ \frac{1}{2}, 1 - y, 1 - z \right\} + (1 - p_x p_y)(1 - z) + (1 - p_x z)y \right) \\ & \quad - (1 - p_y z + p_x + z - 2p_x z + (1 - p_x)(1 - p_y)) \\ &= (-\alpha y z - \alpha p_y(1 - z) - p_y + 2z)p_x \\ & \quad + \alpha(1 - z) + \alpha y + p_y z - z + p_y - 2 + \alpha(1 - p_y z) \max \left\{ \frac{1}{2}, 1 - y, 1 - z \right\}. \end{aligned}$$

The first term is a monotonically decreasing function of  $p_x$  since

$$-\alpha y z - \alpha p_y(1 - z) - p_y + 2z = (\alpha(p_y - y) + 2)z - (\alpha + 1)p_y$$

is an increasing function of  $z$  since  $p_y \geq y$  in the range,

$$-\alpha y z - \alpha p_y(1 - z) - p_y + 2z \leq -\alpha y - p_y + 2 \leq -\frac{\alpha}{2} - f^+\left(\frac{1}{2}\right) + 2 \approx -0.016 < 0.$$

Hence, the function is minimized when  $x$  is maximized. Setting  $x = 1$ ,

$$\begin{aligned} \mathcal{C}' &\geq \alpha \cdot \left( (1 - p_y z) \cdot \frac{1}{2} + (1 - p_y)(1 - z) + (1 - z)y \right) - (2 - p_y z - z) \\ &= \left( -\alpha + 1 - \alpha y + \left( \frac{\alpha}{2} + 1 \right) p_y \right) z + \alpha y - \alpha p_y + \frac{3}{2}\alpha - 2. \end{aligned}$$

Since  $y \geq 1/2$  and  $p_y \leq 1$ ,

$$-\alpha + 1 - \alpha y + \left( \frac{\alpha}{2} + 1 \right) p_y \leq -\alpha + 2 < 0.$$

Hence, the function is minimized when  $z$  is maximized. Setting  $z = 1$ ,

$$\begin{aligned} \mathcal{C}' &\geq \frac{\alpha}{2} - 1 + \left( -\frac{\alpha}{2} + 1 \right) p_y \\ &= \left( \frac{\alpha}{2} - 1 \right) (1 - p_y) \geq 0. \end{aligned}$$

3.  $y \leq z, y < 1/2$

$$\begin{aligned} \mathcal{C}' &= \alpha \cdot ((1 - p_y z)(1 - y) + (1 - p_x p_y)(1 - z) + (1 - p_x z)y) \\ & \quad - (1 - p_y z + p_x + z - 2p_x z + (1 - p_x)(1 - p_y)) \\ &= (-\alpha(1 + p_y - p_y y - p_x p_y + p_x y) + 2p_x + p_y - 1)z \\ & \quad + \alpha(2 - p_x p_y) - 2 + p_y - p_x p_y. \end{aligned}$$

This is a decreasing function of  $z$  since

$$\begin{aligned} & -\alpha(1 + p_y - p_y y - p_x p_y + p_x y) + 2p_x + p_y - 1 \\ & = (2 + \alpha p_y - \alpha y)p_x - \alpha(1 + p_y - p_y y) + p_y - 1 \end{aligned}$$

is an increasing function of  $p_x$  since  $2 + \alpha p_y - \alpha y \geq 2 - \frac{\alpha}{2} \geq 0$ ,

$$\begin{aligned} & -\alpha(1 + p_y - p_y y - p_x p_y + p_x y) + 2p_x + p_y - 1 \\ & \leq -\alpha(1 - p_y y + y) + 1 + p_y \\ & = -(1 - p_y)(1 + \alpha y) - \alpha + 2 \leq -\alpha + 2 < 0. \end{aligned}$$

Hence, the function is minimized when  $z$  is maximized. Setting  $z = 1$ ,

$$C' \geq \alpha \cdot ((1 - p_y)(1 - y) + (1 - p_x)y) - (3 - 2p_x - 2p_y + p_x p_y).$$

As mentioned above, it is sufficient to check on  $x = 1$  and  $x = 1 - y$ .

(a)  $x = 1$

$$\begin{aligned} C' &= \alpha \cdot (1 - p_y)(1 - y) - (1 - p_y) \\ &= (1 - p_y)(\alpha - 1 - \alpha y) \\ &\geq (1 - p_y) \left( \frac{\alpha}{2} - 1 \right) \geq 0. \end{aligned}$$

(b)  $x = 1 - y$

Since  $x = 1 - y > 1/2$ ,  $p_x = \frac{3}{10}x + \frac{7}{10} = 1 - \frac{3}{10}y$ . Therefore,

$$C' = \alpha \cdot \left( (1 - p_y)(1 - y) + \frac{3}{10}y^2 \right) - \left( 1 + \frac{3}{10}y \right) (2 - p_y) + 1.$$

If  $y < 0.19$ ,

$$\begin{aligned} C' &= \alpha \cdot \left( 1 - y + \frac{3}{10}y^2 \right) - 2 \left( 1 + \frac{3}{10}y \right) + 1 \\ &= \frac{1}{200}(129y^2 - 550y + 230) > 0.65 \geq 0. \end{aligned}$$

Otherwise, i.e.  $0.19 \leq y < 1/2 < 0.5095$ ,

$$C' \approx 0.74331 + 2.39737y - 19.7409y^2 + 24.0007y^3,$$

whose minimum value in the region is approximately  $7.236 \times 10^{-6} \geq 0$  in  $y \approx 0.4788$ .

4.  $z < y < 1/2$

$$\begin{aligned} C' &= \alpha \cdot ((1 - p_y z)(1 - z) + (1 - p_x p_y)(1 - z) + (1 - p_x z)y) \\ &\quad - (1 - p_y z + p_x + z - 2p_x z + (1 - p_x)(1 - p_y)) \\ &= \alpha p_y z^2 + (-\alpha(2 + p_y - p_x p_y + p_x y) + 2p_x + p_y - 1)z \\ &\quad + \alpha(2 + y - p_x p_y) - 2 + p_y - p_x p_y. \end{aligned}$$

Differentiating by  $z$ ,

$$\begin{aligned} & 2\alpha p_y z - \alpha(2 + p_y - p_x p_y + p_x y) + 2p_x + p_y - 1 \\ & \leq \alpha p_y - \alpha(2 + p_y - p_x p_y + p_x y) + 2p_x + p_y - 1 \\ & = (-2\alpha + 2p_x + p_y) - \alpha((1 - p_x)p_y + p_x y) - 1 \leq 0 \end{aligned}$$

since  $z < 1/2$  and  $-2\alpha + 2p_x + p_y \leq -2\alpha + 3 = -1.3 < 0$ . Therefore, the function is minimized when  $z$  is maximized.

Plugging  $z = y$ , this now reduce to Case 3 with  $z = y$  due to the continuity of  $C'$ .

## E.6 $(\circ, -, -)$ Triangles

As in [E.1](#),  $2e.lp_w(u, v) \geq e.cost_w(u, v)$ . For other two terms,

$$\begin{aligned} e.lp_u(v, w) + e.lp_v(w, u) &\geq (1 - p_{uv}z)(1 - y) + (1 - p_{uv}y)(1 - z) \\ &\geq (1 - p_{uv})(1 - y) + (1 - p_{uv})(1 - z) \\ &= (1 - p_{uv})(1 - p_{vw}) + (1 - p_{uv})(1 - p_{wu}) \\ &= e.cost_v(w, u) + e.cost_u(v, w). \end{aligned}$$

Hence,  $2 \cdot LP - ALG \geq 0$ .

This completes our case analysis.
